# Supplementary material for: An ultrafast process for the fabrication of a Li metal–inorganic solid electrolyte interface
Source: Royal Society of Chemistry journal article supplement (doi:10.1039/d1ee00759a), 2021-01-01
Supplement: d1ee00759a3.pdf [file d1ee00759a3.pdf]

## Supplementary Information

### **An ultrafast process for fabrication of Li metal–inorganic solid electrolyte interface**

Hirokazu Kitaura<sup>a\*</sup>, Eiji Hosono<sup>a, b</sup>, Haoshen Zhou<sup>a</sup>

<sup>a</sup>Research Institute for Energy Conservation, National Institute of Advanced Industrial Science and Technology (AIST), Umezono 1-1-1, Tsukuba, Ibaraki 305-8568, Japan.

<sup>b</sup>Global Zero Emission Research Center, National Institute of Advanced Industrial Science and Technology (AIST), Umezono 1-1-1, Tsukuba, Ibaraki 305-8568, Japan.

\*Correspondence to: [kitaura-22@aist.go.jp](mailto:kitaura-22@aist.go.jp)

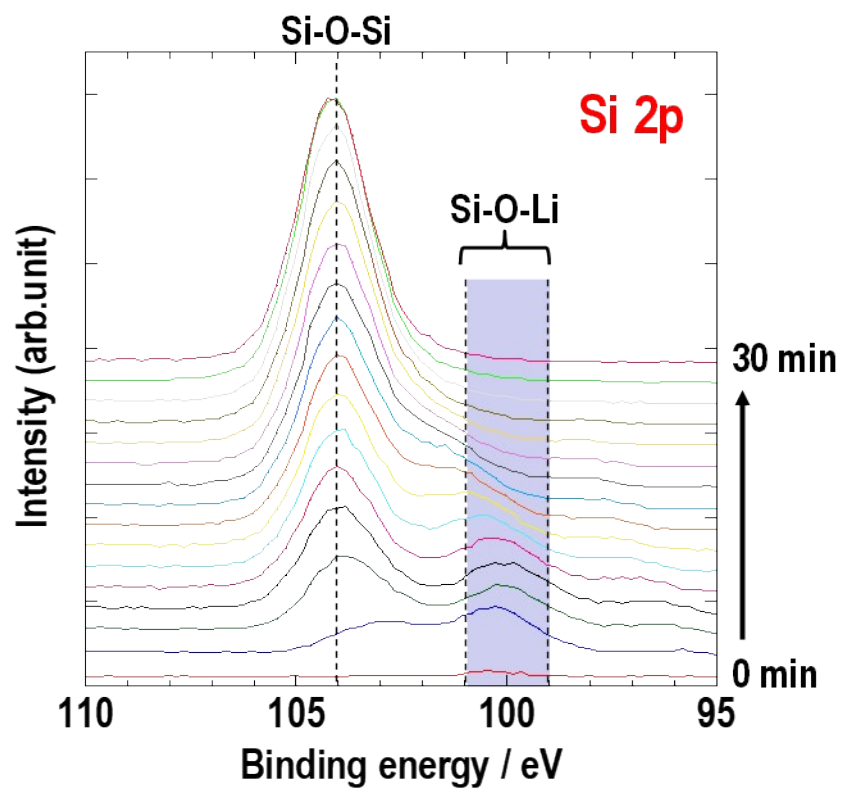

**Fig. S1.**  
Si 2p XPS spectra during sputtering for 30 min.

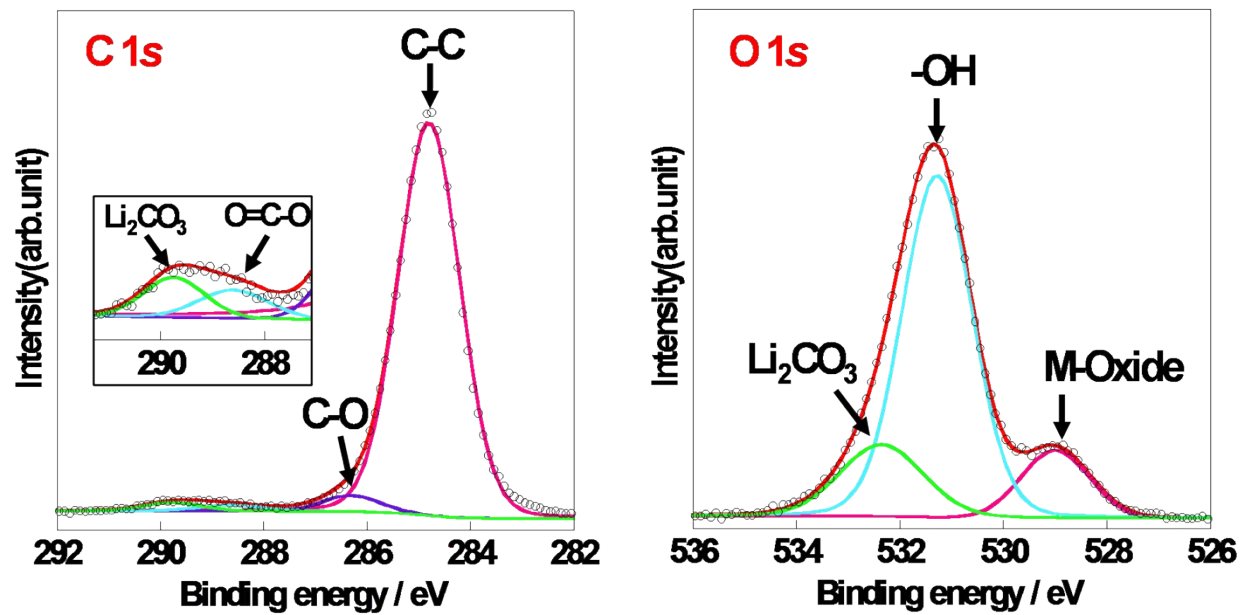

Fig. S2.

C 1s and O 1s XPS spectra of the surface of LLZ after polishing.

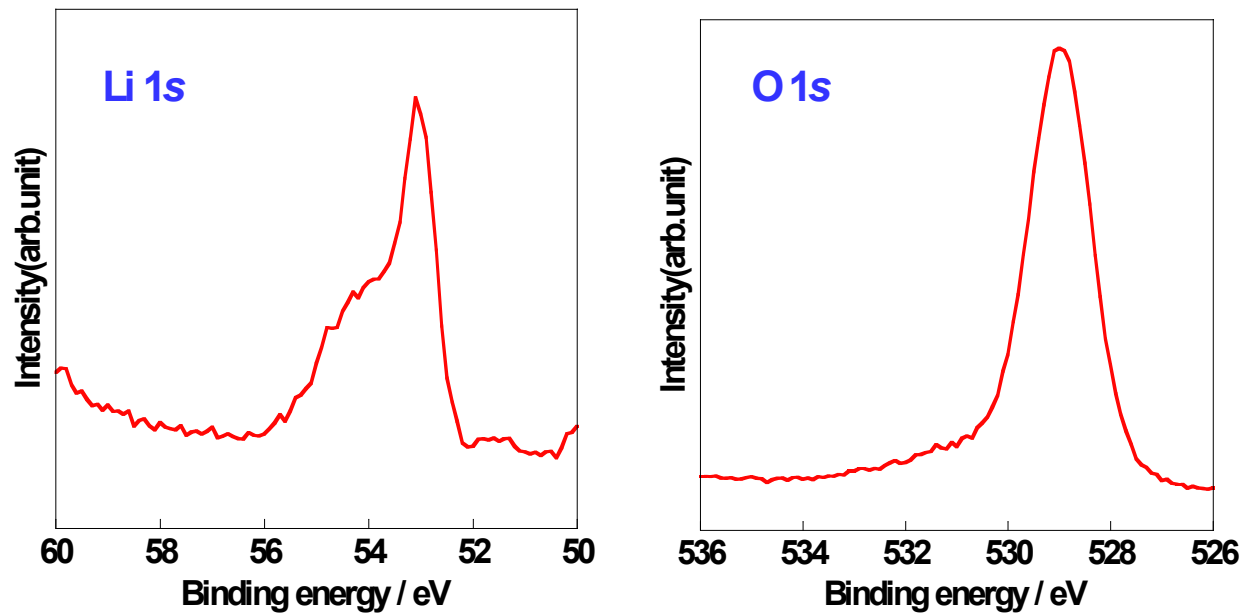

Fig. S3.

Li 1s and O 1s XPS spectra of Li-LLZ interface constructed by the UFW method.

**Li-Li<sub>2</sub>CO<sub>3</sub>**

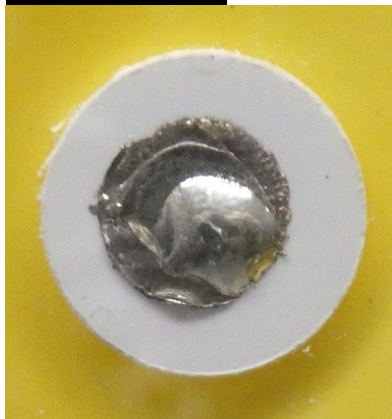

**Li-LiOH**

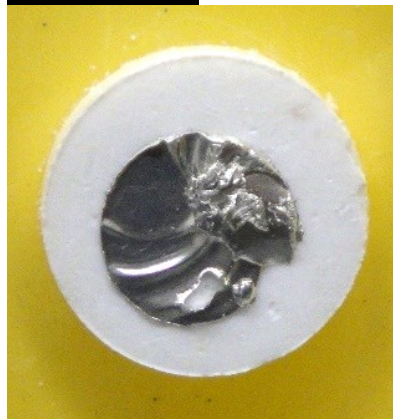

**Fig. S4.**

Photographs of Li-Li<sub>2</sub>CO<sub>3</sub> and Li-LiOH prepared by the UFW method.

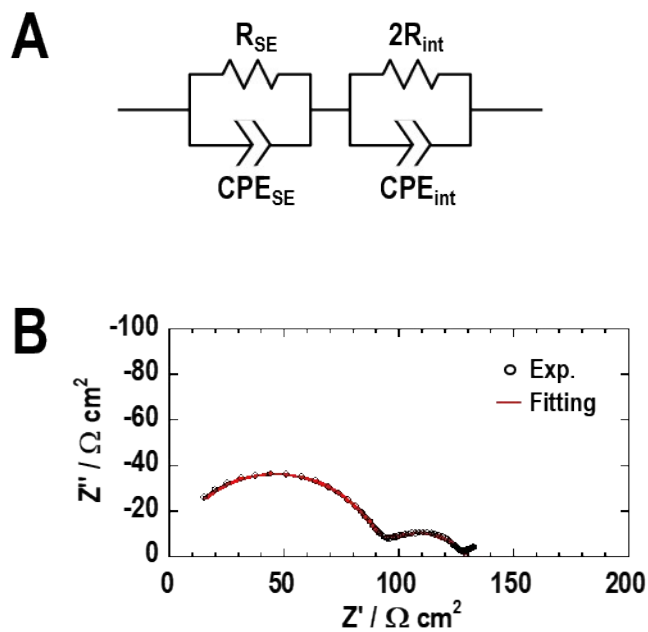

**Fig. S5.**

Impedance analysis of Li|LLZ|Li symmetrical cell. (A) Equivalent circuit model used for fitting. (B) Impedance plot and fitting result.

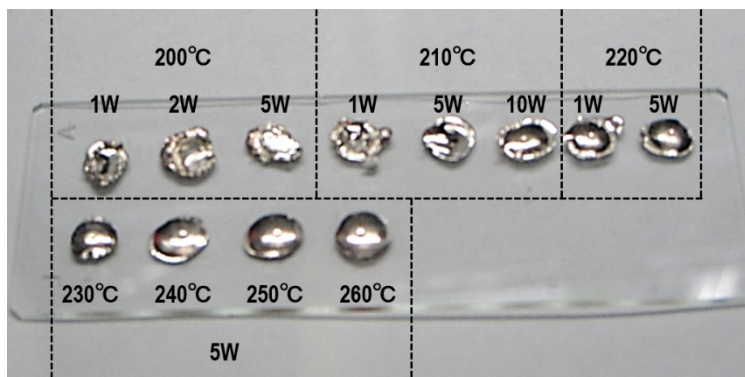

**Fig. S6.**

Li spots on the glass slide joined by the UFW method under various conditions.

**Movie S1.**

Observation of joining of melt lithium with glass substrate without ultrasonic irradiation.

**Movie S2.**

Observation of joining of melt lithium with glass substrate with ultrasonic irradiation.
